# Supplementary material for: Untargeted metabolomics revealed the regulatory effect of Maillard reaction products of ovalbumin with different degrees on the metabolism of colitis mice
Source: Royal Society of Chemistry journal article supplement (doi:10.1039/d3fo01810e), 2023-01-01
Supplement: d3fo01810e1.pdf [file d3fo01810e1.pdf]

**Table.S1 Criteria for the scoring of colonic damage**

| Score | Criteria                                                                                                                                         |
|-------|--------------------------------------------------------------------------------------------------------------------------------------------------|
| 0     | No damage                                                                                                                                        |
| 1     | Hyperaemia; no ulcers                                                                                                                            |
| 2     | Hyperaemia, hydroncus; no ulcers                                                                                                                 |
| 3     | Hyperaemia, hydroncus; One ulcer without thickening of the bowel wall                                                                            |
| 4     | Two or more sites of ulceration/inflammation                                                                                                     |
| 5     | Two or more major sites of ulceration and inflammation or one site of ulceration/inflammation extended > 1 cm along the length of the bowel wall |

**Table.S2 Statistics on the number of metabolites in the differential metabolite set**

| Mode | Total number | M-CK | M-L-MRPs | M-H-MRPs |
|------|--------------|------|----------|----------|
| pos  | 374          | 139  | 82       | 132      |
| neg  | 242          | 93   | 43       | 78       |
| up   | 277          | 77   | 40       | 160      |
| down | 290          | 155  | 85       | 50       |

**Table.S3 The 20 KEGG pathways enriched in M-L-MRPs sets**

| No. | Pathway Description                                                         | P value | Pathway_ID |
|-----|-----------------------------------------------------------------------------|---------|------------|
| 1   | Secondary bile acid biosynthesis                                            | 0.0001  | map00121   |
| 2   | Bile secretion                                                              | 0.0001  | map04976   |
| 3   | Primary bile acid biosynthesis                                              | 0.0007  | map00120   |
| 4   | Biosynthesis of various secondary metabolites                               | 0.0088  | map00997   |
| 5   | Cholesterol metabolism                                                      | 0.0103  | map04979   |
| 6   | Biosynthesis of siderophore group nonribosomal peptides                     | 0.0617  | map01053   |
| 7   | Pyrimidine metabolism                                                       | 0.1411  | map00240   |
| 8   | Biosynthesis of alkaloids derived from ornithine, lysine and nicotinic acid | 0.1411  | map01066   |
| 9   | Pentose and glucuronate interconversions                                    | 0.1746  | map00040   |
| 10  | Glucagon signaling pathway                                                  | 0.1746  | map04922   |
| 11  | Biosynthesis of terpenoids and steroids                                     | 0.1746  | map01062   |
| 12  | Ascorbate and aldarate metabolism                                           | 0.2262  | map00053   |
| 13  | Citrate cycle (TCA cycle)                                                   | 0.2262  | map00020   |
| 14  | beta-Alanine metabolism                                                     | 0.2262  | map00410   |
| 15  | Pantothenate and CoA biosynthesis                                           | 0.2262  | map00770   |
| 16  | Biosynthesis of alkaloids derived from terpenoid and polyketide             | 0.2262  | map01064   |
| 17  | Carbon fixation pathways in prokaryotes                                     | 0.2747  | map00720   |
| 18  | Phosphotransferase system (PTS)                                             | 0.2747  | map02060   |
| 19  | Taurine and hypotaurine metabolism                                          | 0.2747  | map00430   |
| 20  | Biosynthesis of alkaloids                                                   | 0.3205  | map01065   |

Note: Arranged according to P value

**Table.S4 The 20 KEGG pathways enriched in M-H-MRPs sets**

| No. | Pathway Description                   | P value | Pathway_ID |
|-----|---------------------------------------|---------|------------|
| 1   | ABC transporters                      | 0.0001  | map02010   |
| 2   | Pyrimidine metabolism                 | 0.0008  | map00240   |
| 3   | Protein digestion and absorption      | 0.0079  | map04974   |
| 4   | Arginine and proline metabolism       | 0.0209  | map00330   |
| 5   | Cholesterol metabolism                | 0.0286  | map04979   |
| 6   | Prodigiosin biosynthesis              | 0.0509  | map00333   |
| 7   | Caffeine metabolism                   | 0.0619  | map00232   |
| 8   | Arginine biosynthesis                 | 0.0646  | map00220   |
| 9   | Retinol metabolism                    | 0.0701  | map00830   |
| 10  | Carbohydrate digestion and absorption | 0.0755  | map04973   |
| 11  | Mineral absorption                    | 0.0808  | map04978   |
| 12  | Pantothenate and CoA biosynthesis     | 0.0835  | map00770   |
| 13  | Carbapenem biosynthesis               | 0.0888  | map00332   |
| 14  | Novobiocin biosynthesis               | 0.0888  | map00401   |
| 15  | Pyruvate metabolism                   | 0.0888  | map00620   |
| 16  | beta-Alanine metabolism               | 0.0888  | map00410   |
| 17  | Biosynthesis of alkaloids             | 0.0968  | map01065   |
| 18  | Pentose phosphate pathway             | 0.0968  | map00030   |
| 19  | Secondary bile acid biosynthesis      | 0.0994  | map00121   |
| 20  | Central carbon metabolism in cancer   | 0.102   | map05230   |

Note: Arranged according to P value.
